# Supplementary material for: A qualitative study to investigate Swiss hospital personnel’s perceived importance of and experiences with patient’s mental–somatic multimorbidities
Source: Springer Nature journal article supplement (doi:10.1186/s12888-021-03353-5), 2021-07-12
Supplement: MOESM2 [file 19353958]

## SomPsyNet Consortium

Nicola Julia Aebi<sup>1,2</sup>, Seraina Caviezel<sup>3</sup>, Rainer Schaefer<sup>3</sup>, Gunther Meinlschmidt<sup>3,4,5</sup>, Matthias Schwenkglenks<sup>6</sup>, Günther Fink<sup>1,2</sup>, Lara Riedo<sup>7</sup>, Thomas Leyhe<sup>8,9</sup>, Kaspar Wyss<sup>1,2</sup>, Klaus Bally<sup>10</sup>, Alexander Frick<sup>3</sup>, Iris Bänteli<sup>3</sup>, Anja Studer<sup>7</sup>, Marco Bachmann<sup>11</sup>, Sibil Tschudin<sup>12</sup>, Andreas Dörner<sup>13</sup>, Christina Karpf<sup>7</sup>, Gabriele Bales<sup>14</sup>, Katharina Sophie Barthelmess<sup>3</sup>, Stefano Bassetti<sup>15,16</sup>, Reto Baumgartner<sup>17</sup>, Stefanie Bosman<sup>13</sup>, Virginie Bourquin<sup>3</sup>, David Büchel<sup>3</sup>, Luka Damjanov<sup>3</sup>, Lukas Ebner<sup>3</sup>, Jennifer Erb<sup>3</sup>, Peter Ettlin<sup>18</sup>, Elvira Fasel<sup>11</sup>, Lavinia Flückiger<sup>19</sup>, Johanna Fremmer<sup>3</sup>, Florian F. Grossmann<sup>20</sup>, Anja Hermann<sup>21</sup>, Matthew Hotopf<sup>22</sup>, Lydia Isler-Christ<sup>23,24</sup>, Maria C. Katapodi<sup>25,26</sup>, Robert C. Keller<sup>27</sup>, Sabrina Klimmeck<sup>28</sup>, Melinda Kress<sup>3</sup>, Yvonne Künstle<sup>3</sup>, Undine E. Lang<sup>29</sup>, Yasmin Liechti<sup>3</sup>, Sherado Mazander<sup>30</sup>, Daria Meier<sup>3</sup>, Alexander Minzer<sup>31</sup>, Francisca Schiess<sup>32</sup>, Felix Schirmer<sup>33</sup>, Nadine Schur<sup>6</sup>, Peter Schwob<sup>34</sup>, Sonja Seelmann<sup>15</sup>, Gayoung Son<sup>3</sup>, Thomas Steffen<sup>35</sup>, Friedrich Stiefel<sup>36</sup>, Marion Tegethoff<sup>37</sup>, Corinne Urech<sup>38</sup>, Thomas von Allmen<sup>39</sup>, Lilly-Sophie Walzer<sup>3</sup>, Sybille Werner<sup>3</sup>, Andrea Wetz<sup>40</sup>, Dragana Weyermann<sup>41</sup>, Christoph Zäh<sup>3</sup>, Diana Zwahlen<sup>3</sup>

<sup>1</sup> Swiss Tropical and Public Health Institute, Basel, Switzerland

<sup>2</sup> University of Basel, Basel, Switzerland

<sup>3</sup> Department of Psychosomatic Medicine, University Hospital and University of Basel, Basel, Switzerland

<sup>4</sup> Division of Clinical Psychology and Cognitive Behavioural Therapy, International Psychoanalytic University, Berlin, Germany

<sup>5</sup> Division of Clinical Psychology and Epidemiology, Department of Psychology, University of Basel, Basel, Switzerland

<sup>6</sup> Institute of Pharmaceutical Medicine (ECPM), University of Basel, Basel, Switzerland

<sup>7</sup> Department of Health Canton Basel-Stadt, Division of Prevention, Basel, Switzerland

<sup>8</sup> University of Basel, Geriatric Psychiatry, University Department of Geriatric Medicine  
FELIX PLATTER, Basel, Switzerland

<sup>9</sup> University of Basel, Center of Old Age Psychiatry, Psychiatric University Hospital,  
Basel, Switzerland

<sup>10</sup> Centre for Primary Health Care, University of Basel, Switzerland

<sup>11</sup> Department of Psychiatry and Psychosomatics, Bethesda Hospital, Basel,  
Switzerland

<sup>12</sup> Department of Obstetrics and Gynecology, University Hospital and University of  
Basel, Switzerland

<sup>13</sup> St. Claraspital, Medical clinic, Basel, Switzerland

<sup>14</sup> University Department of Geriatric Medicine FELIX PLATTER, Basel, Switzerland

<sup>15</sup> Division of Internal Medicine, University Hospital and University of Basel, Basel,  
Switzerland;

<sup>16</sup> Department of Clinical Research, University Hospital and University of Basel, Basel,  
Switzerland

<sup>17</sup> Social Insurance Institution Basel-Landschaft, Binningen, Switzerland

<sup>18</sup> Foundation Rheinleben, Basel, Switzerland

<sup>19</sup> Department of Health Canton Basel-Stadt, Division of Addictions, Basel, Switzerland

<sup>20</sup> Department of Medicine, Division of Nursing, University Hospital Basel, Basel,  
Switzerland

<sup>21</sup> Direktion Pflege/MTT, University Hospital and University of Basel, Basel, Switzerland

<sup>22</sup> Department of Psychological Medicine, Institute of Psychiatry, Psychology and  
Neuroscience, King's College London, London, United Kingdom

<sup>23</sup> Sevogel-Apotheke, Basel, Switzerland

<sup>24</sup> Baselstädtischer Apotheker-Verband, Basel, Switzerland

- <sup>25</sup> Department of Clinical Research, University of Basel, Basel, Switzerland
- <sup>26</sup> University of Michigan School of Nursing, Ann Arbor, MI USA
- <sup>27</sup> Swiss Heart Foundation, Bern, Switzerland
- <sup>28</sup> University Hospital of Basel, Basel, Switzerland
- <sup>29</sup> University Psychiatric Clinics (UPK), Department of Psychiatry and Psychotherapy, Basel, Switzerland
- <sup>30</sup> IV-Stelle Basel-Stadt, Basel, Switzerland
- <sup>31</sup> Swiss Academy for Psychosomatic and Psychosocial Medicine (SAPPM), Reiden, Switzerland
- <sup>32</sup> Centre of Self-Help Basel, Basel, Switzerland
- <sup>33</sup> Vereinigung der psychosomatisch tätigen Aerztinnen und Aerzte der Region Basel, Basel, Switzerland
- <sup>34</sup> Psychotherapists Association of Basel VPB, Basel, Switzerland
- <sup>35</sup> Department of Health Canton Basel-Stadt, Medical Services, Basel, Switzerland
- <sup>36</sup> Liaisonpsychiatrischer Dienst, University Hospital Lausanne, Lausanne, Switzerland
- <sup>37</sup> Institute of Psychology, RWTH Aachen University, Aachen, Germany
- <sup>38</sup> Gyn. Social Medicine and Psychosomatics, University Hospital and University of Basel, Basel, Switzerland
- <sup>39</sup> Department of Health Canton Basel-Stadt, Health Care, Basel, Switzerland
- <sup>40</sup> Rheumaliga beider Basel, Basel, Switzerland
- <sup>41</sup> Patientenstelle Basel, Basel, Switzerland
